# Supplementary material
Source: PubMed Central journal article supplement (PMC4163078)
Supplement: NIHMS619252-supplement-07.pdf [file NIHMS619252-supplement-07.pdf]

**Supplemental Table S1****Strains used in this study**

| Strain | Genotype                                                                                                                                                                                  | Source       |
|--------|-------------------------------------------------------------------------------------------------------------------------------------------------------------------------------------------|--------------|
| FY527  | <i>h- leu1-32 ura4-D18 his3-D1 ade6-M216</i>                                                                                                                                              | S. Forsburg  |
| FY528  | <i>h+ leu1-32 ura4-D18 his3-D1 ade6-M210</i>                                                                                                                                              | S. Forsburg  |
| TP50   | <i>h+ Δmyp2::his7<sup>+</sup> his7-366 leu1-32 ura4-Δ18 ade6-M216</i>                                                                                                                     | Lab Stock    |
| 7904   | <i>h- cdc15::cdc15ΔSH3<sub>1-869</sub>-FLAG3/kanR ade6-M210 ura4-D18 leu1-32</i>                                                                                                          | K. Gould     |
| 8199   | <i>h- cdc15::cdc15ΔSH3-mCherry/kanR ade6-M210 ura4-D18 leu1-32</i>                                                                                                                        | K. Gould     |
| DMY822 | <i>h- clp1Δ::ura4+ ade6-M216 leu1-32 ura4-D18</i>                                                                                                                                         | Dan McCollum |
| DMY821 | <i>h+ clp1Δ::ura4+ ade6-M216 leu1-32 ura4-D18Δ</i>                                                                                                                                        | Dan McCollum |
| JW1114 | <i>h+ cdc12-3YFP-kanMX6 sad1-CFP-kanMX6 ade6 leu1-32 ura4-D18</i>                                                                                                                         | Lab Stock    |
| JW784  | <i>h myp2-YFP-kanMX6 sad1-CFP-kanMX6 ade6-M210 leu1-32 ura4-D18</i>                                                                                                                       | Lab Stock    |
| QC196  | <i>h leu1-32 ura4-D18 his3-D1 ade6-M21X mcherry-atb2::hph</i>                                                                                                                             | Qian Chen    |
| AR51   | <i>h- cdc15-140 leu1-32</i>                                                                                                                                                               | Simanis V    |
| AR140  | <i>h+ leu1-32 ura4-D18 ade6-M210 kanMX6-Pcdc15-mEGFP-cdc15</i>                                                                                                                            | Lab Stock    |
| AR306  | <i>kanMX6-P<sub>41xnm1</sub>-mEGFP-cdc15 ade6 leu1-32 ura4-D18</i>                                                                                                                        | Lab Stock    |
| AR307  | <i>h- leu1-32 ura4-D18 his3-D1 ade6-M216 kanMX6-P41xnm1-cdc15</i>                                                                                                                         | Lab Stock    |
| AR311  | <i>h- rlc1-tdTomato-natMX6 sad1-GFP-kanMX6 leu1-32 ura4-D18 his3-D1 ade6-M21X</i>                                                                                                         | Lab Stock    |
| AR333  | <i>h kanMX6-P<sub>41xnm1</sub>-cdc15 rlc1-tdTomato-natMX6 sad1-GFP-kanMX6</i>                                                                                                             | Lab Stock    |
| AR344  | <i>h+ anp1-mCherry-natMX6 leu1-32 ura4-D18 his3-D1 ade6-M216</i>                                                                                                                          | Lab Stock    |
| AR350  | <i>h+ sec72-mEGFP-kanMX6 leu1-32 ura4-D18 his3-D1 ade6-M216</i>                                                                                                                           | Lab Stock    |
| AR493  | <i>cps1-191 ade6-210 ura4-D18 lys1-131 h<sup>-</sup></i>                                                                                                                                  | Lab Stock    |
| AR575  | <i>h- cdc15::cdc15ΔSH3<sub>1-869</sub>-FLAG3/kanR ade6-M210 ura4-D18 leu1-32 rlc1-tdTomato-natMX6 sad1-GFP-kanMX6</i>                                                                     | Lab Stock    |
| AR581  | <i>h rlc1-tdTomato-natMX6 sad1-GFP-kanMX6 bgs1Δ::ura4<sup>+</sup> P<sub>bgs1</sub><sup>+</sup>::GFP-bgs1<sup>+</sup>:leu1<sup>+</sup> leu1-32 ura4-D18 his3-D1 ade6-M21X</i>              | Lab Stock    |
| AR582  | <i>h clp1Δ::ura4+ rlc1-tdTomato-natMX6 sad1-GFP-kanMX6 bgs1Δ::ura4<sup>+</sup> P<sub>bgs1</sub><sup>+</sup>::GFP-bgs1<sup>+</sup>:leu1<sup>+</sup> leu1-32 ura4-D18 his3-D1 ade6-M21X</i> | Lab Stock    |
| AR602  | <i>h- leu1-32 ura4-Δ18 his3-Δ1 bgs1Δ::ura4<sup>+</sup> P<sub>bgs1</sub><sup>+</sup>::GFP-bgs1<sup>+</sup>:leu1<sup>+</sup></i>                                                            | Lab Stock    |
| AR609  | <i>h Δmyp2::his7+ kanMX6-P<sub>41xnm1</sub>-cdc15 rlc1-tdTomato-natMX6 sad1-GFP-kanMX6</i>                                                                                                | Lab Stock    |

Role of Cdc15p in cytokinesis

|        |                                                                                                                                                                                                                          |             |
|--------|--------------------------------------------------------------------------------------------------------------------------------------------------------------------------------------------------------------------------|-------------|
| AR619  | <i>h Δmyp2::his7+ rlc1-tdTomato-natMX6 sad1-GFP-kanMX6 bgs1Δ::ura4+ P<sub>bgs1</sub><sup>+</sup>::GFP-bgs1<sup>+</sup>:leu1<sup>+</sup> leu1-32 ura4-D18 his3-D1 ade6-M21X</i>                                           | Lab Stock   |
| AR625  | <i>h kanMX6-P<sub>41xnmt1</sub>-mEGFP-cdc15 ade6 leu1-32 ura4-D18 mcherry-atb2::hph</i>                                                                                                                                  | Lab Stock   |
| AR630  | <i>h+ Δmyp2::his7<sup>+</sup> his7-366 cdc15-140 leu1-32</i>                                                                                                                                                             | Lab Stock   |
| AR650  | <i>h kanMX6-P41xnmt1-cdc15 rlc1-tdTomato-natMX6 sad1-GFP-kanMX6 bgs1Δ::ura4<sup>+</sup> P<sub>bgs1</sub><sup>+</sup>::GFP-bgs1<sup>+</sup>:leu1<sup>+</sup> leu1-32 ura4-D18 his3-D1 ade6-M21X</i>                       | Lab Stock   |
| AR651  | <i>h sec72-mCherry-kanMX6 bgs1Δ::ura4<sup>+</sup> P<sub>bgs1</sub><sup>+</sup>::GFP-bgs1<sup>+</sup>:leu1<sup>+</sup> leu1-32 ura4-D18 his3-D1 ade6-M21X</i>                                                             | Lab Stock   |
| AR652  | <i>h kanMX6-P41xnmt1-cdc15 cdc12-3xYFP-kanMX6 sad1-CFP-kanMX6 ade6-M21X leu1-32 ura4-D18</i>                                                                                                                             | Lab Stock   |
| AR705  | <i>h cdc15::cdc15ΔSH3<sub>1-869</sub>-FLAG3/kanR rlc1-tdTomato-natMX6 sad1-GFP-kanMX6 bgs1Δ::ura4<sup>+</sup> P<sub>bgs1</sub><sup>+</sup>::GFP-bgs1<sup>+</sup>:leu1<sup>+</sup> leu1-32 ura4-D18 his3-D1 ade6-M21X</i> | Lab Stock   |
| AR710  | <i>h clp1Δ::ura4+ myp2-YFP-kanMX6 sad1-CFP-kanMX6 ade6-M21X leu1-32 ura4-D18</i>                                                                                                                                         | Lab Stock   |
| AR711  | <i>h leu1-32 ura4-D18 his3-D1 ade6-M21X kanMX6-P41xnmt1-cdc15 myp2-YFP-kanMX6 sad1-CFP-kanMX6</i>                                                                                                                        | Lab Stock   |
| AR712  | <i>h cdc15::cdc15ΔSH3-FLAG3/kanR ade6-M210 ura4-D18 leu1-32 myp2-YFP-kanMX6 sad1-CFP-kanMX6</i>                                                                                                                          | Lab Stock   |
| AR736  | <i>h<sup>-</sup> mcherry-atb2::hph rlc1-tdTomato-natMX6 cps1-191 ade6-210 ura4-D18 lys1-131</i>                                                                                                                          | Lab Stock   |
| AR737  | <i>h- leu1-32 ura4-D18 his3-D1 ade6-M216 kanMX6-P41xnmt1-cdc15 P<sub>cdc15</sub><sup>+</sup>::mCherry-cdc15FBD<sup>+</sup>:leu1<sup>+</sup></i>                                                                          | Lab Stock   |
| AR738  | <i>h- leu1-32 ura4-D18 his3-D1 ade6-M216 sad1-mEGFP-kanMX6 kanMX6-P41xnmt1-cdc15 P<sub>cdc15</sub><sup>+</sup>::mCherry-cdc15MD<sup>+</sup>:leu1<sup>+</sup></i>                                                         | Lab Stock   |
| AR739  | <i>h- leu1-32 ura4-D18 his3-D1 ade6-M216 kanMX6-P41xnmt1-cdc15 mEGFP-P<sub>bgs1</sub><sup>-</sup>-bgs1<sup>+</sup>-kanMX6 P<sub>cdc15</sub><sup>+</sup>::mCherry-cdc15MD<sup>+</sup>:leu1<sup>+</sup></i>                | Lab Stock   |
| AR746  | <i>cdc15::cdc15ΔSH3-mCherry/kanR ade6-M210 ura4-D18 leu1-32 mEGFP-P<sub>bgs1</sub><sup>-</sup>-bgs1<sup>+</sup>-kanMX6</i>                                                                                               | Lab Stock   |
| AR747  | <i>h- leu1-32 ura4-D18 his3-D1 ade6-M216 kanMX6-P41xnmt1-cdc15 P<sub>cdc15</sub><sup>+</sup>::mCherry-cdc15MD<sup>+</sup>:leu1<sup>+</sup></i>                                                                           | Lab Stock   |
| AR749  | <i>h- leu1-32 ura4-D18 his3-D1 ade6-M216 sad1-mEGFP-kanMX6 kanMX6-P41xnmt1-cdc15 P<sub>cdc15</sub><sup>+</sup>::mCherry-cdc15FBD<sup>+</sup>:leu1<sup>+</sup></i>                                                        | Lab Stock   |
| AR750  | <i>h- leu1-32 ura4-D18 his3-D1 ade6-M216 sad1-mCherry kanMX6-P41xnmt1-cdc15 rlc1-mEGFP-kanMX6 P<sub>cdc15</sub><sup>+</sup>::mCherry-cdc15MD<sup>+</sup>:leu1<sup>+</sup></i>                                            | Lab Stock   |
| IRT058 | <i>h+ leu1-32, ura4-D18, ade6-M21X, kanMX6 Pcdc15-mCherry-cdc15</i>                                                                                                                                                      | Lab Stock   |
| VS1027 | <i>h- clc1-mCherry-natMX6 ade6-M216 ura4-D18 his3-D1 leu1-32</i>                                                                                                                                                         | V. Sirotkin |
| AR767  | <i>h clc1-mCherry-natMX6 sec72-mEGFP-kanMX6 leu1-32 ura4-D18 his3-D1 ade6-M21X</i>                                                                                                                                       | Lab Stock   |
